# Supplementary material for: Analysis of electric cigarette liquid effect on mouse brain tumor growth through EGFR and ERK activation
Source: PubMed Central journal article supplement (PMC8425573; doi:10.1371/journal.pone.0256730), 2021-09-08
Supplement: pone.0256730.s001.pdf [file pone.0256730.s001.pdf]

Western blot data

# CSC2 T-EGFR, p-EGFR, B-actin (Low exposure)

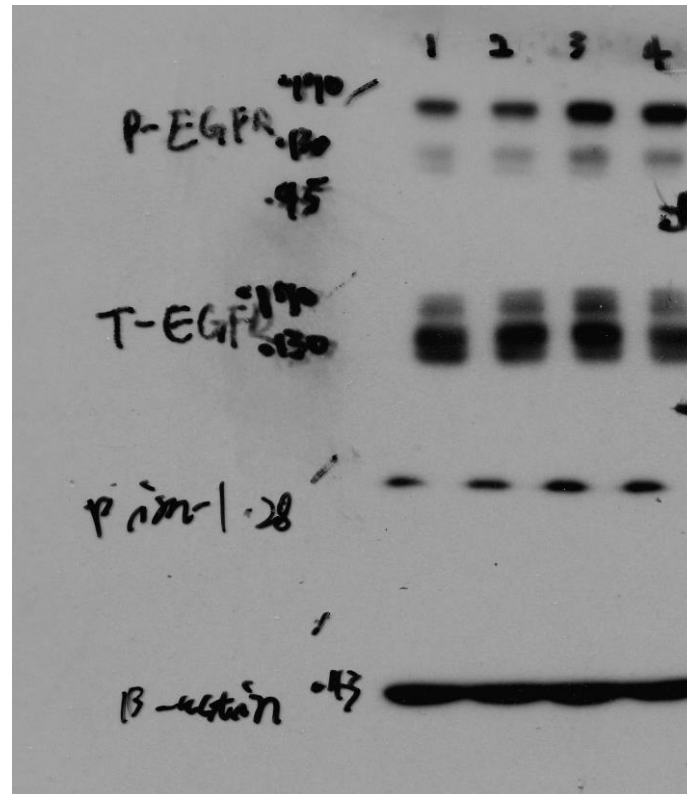

Nicotine concentration

1=Vehicle, 2=19.7 ng/ml, 3=39.5 ng/ml, 4=79.1 ng/ml

# CSC2 T-STAT3, p-STAT3, T-AKT, p-AKT, T-ERK, p-ERK (Low exposure)

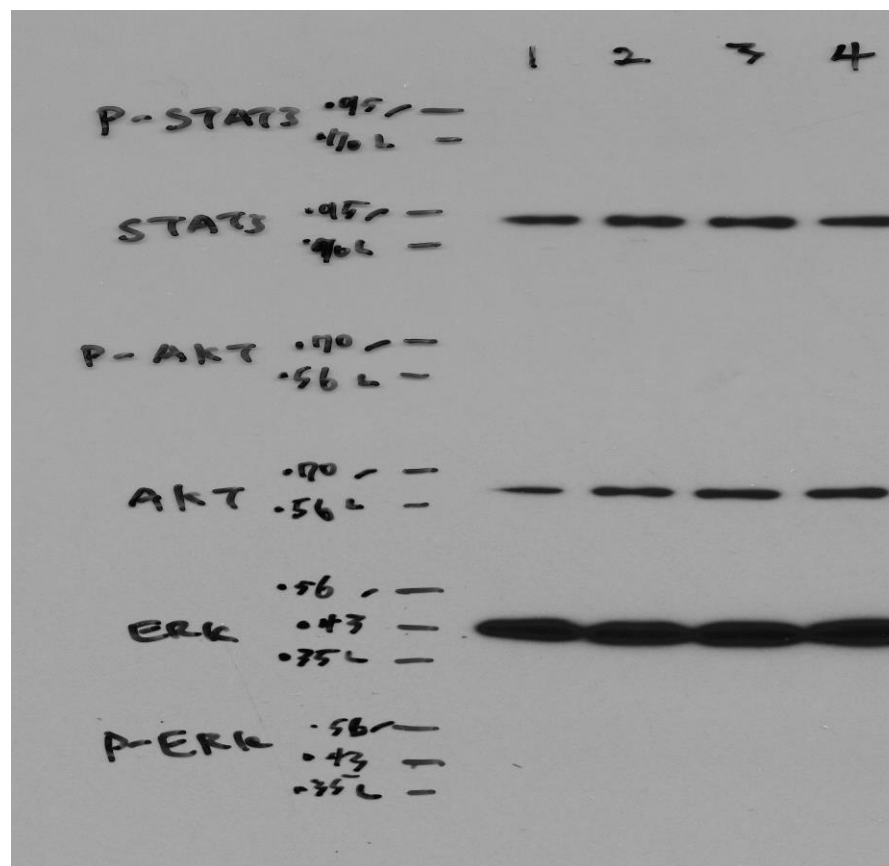

Nicotine concentration

1=Vehicle, 2=19.7 ng/ml, 3=39.5 ng/ml, 4=79.1 ng/ml

# CSC2 p-STAT3, p-AKT, p-ERK (High exposure)

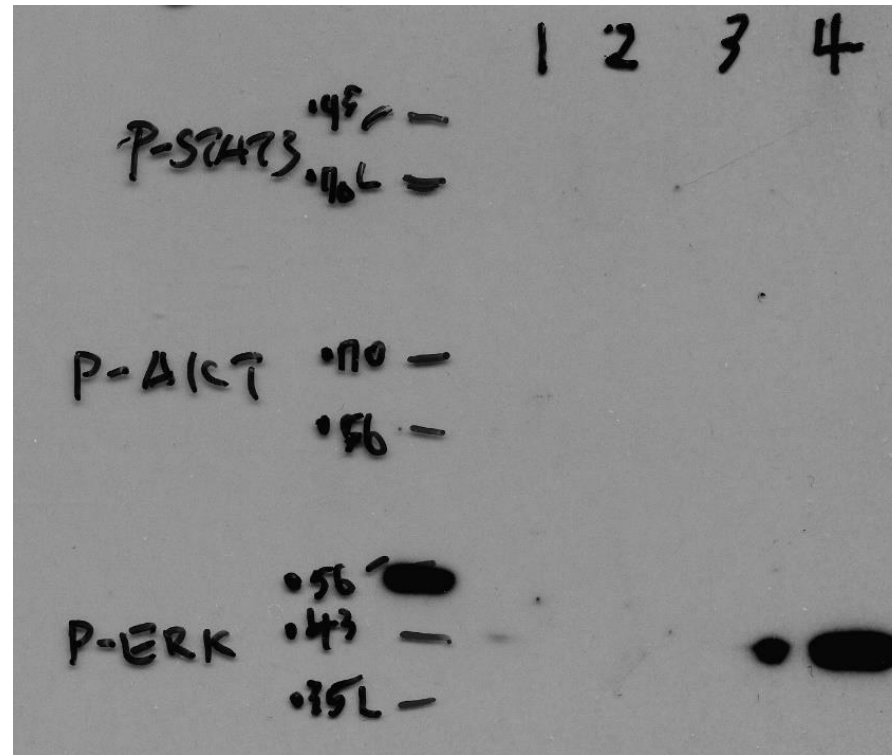

Nicotine concentration

1=Vehicle, 2=19.7 ng/ml, 3=39.5 ng/ml, 4=79.1 ng/ml

# ASCR T-EGFR, p-EGFR, B-actin (Low exposure)

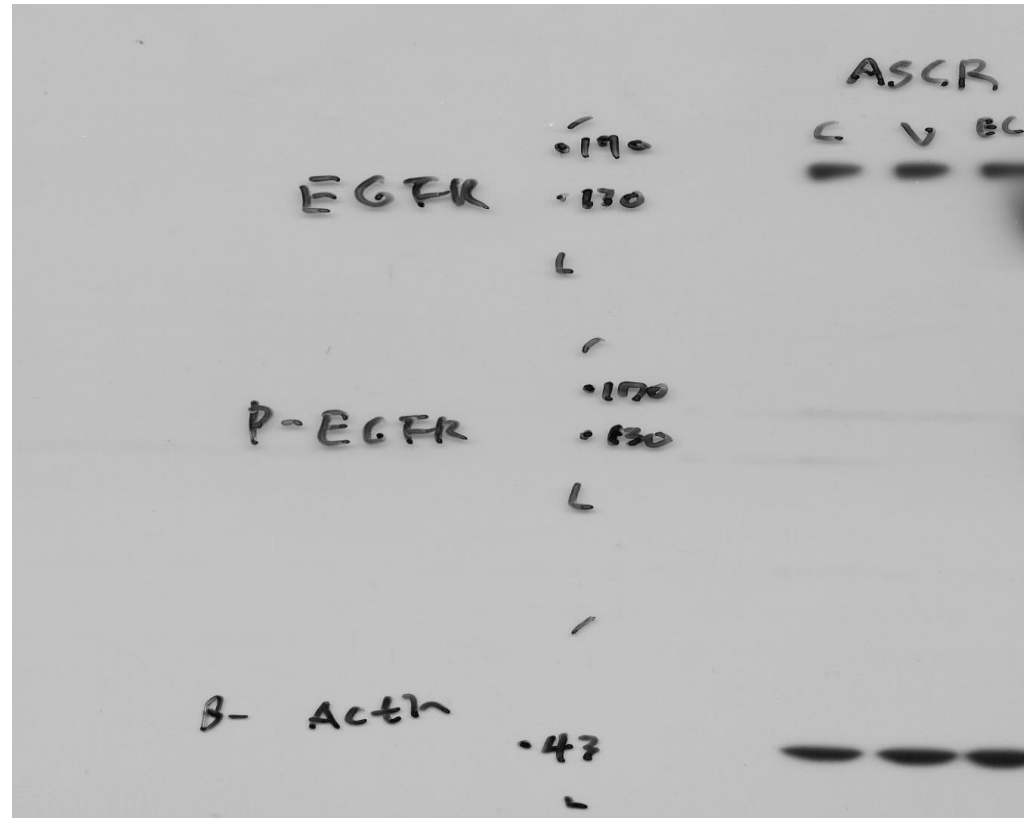

Nicotine concentration

C=Control, V=Vehicle, EC=39.5 ng/ml
